# Supplementary material for: PRKAR1A deficiency impedes hypertrophy and reduces heart size
Source: PubMed Central journal article supplement (PMC7093752; doi:10.14814/phy2.14405), 2020-03-25
Supplement: PHY2-8-e14405-s001.pdf [file PHY2-8-e14405-s001.pdf]

## ***PRKAR1A* deficiency impedes hypertrophy and reduces heart size**

Yuening Liu<sup>1</sup>, Peng Xia<sup>1</sup>, Jingrui Chen<sup>1</sup>, W. Patricia Bandettini<sup>2</sup>, Lawrence S. Kirschner<sup>3</sup>,  
Constantine A. Stratakis<sup>4,#</sup>, Zhaokang Cheng<sup>1,#</sup>

<sup>1</sup> Department of Pharmaceutical Sciences, Washington State University, PBS 423, 412 E. Spokane Falls Blvd., Spokane, WA 99202-2131, USA

<sup>2</sup> National Heart, Lung, and Blood Institute, National Institutes of Health, 10 Center Drive, Rm B1D-47, Bethesda, Maryland 20892-1061, USA

<sup>3</sup> Department of Cancer Biology and Genetics, The Ohio State University, BRT 510, 460 W 12th Avenue, Columbus, Ohio 43210, USA

<sup>4</sup> Section on Endocrinology and Genetics, *Eunice Kennedy Shriver* National Institute of Child Health and Human Development, National Institutes of Health, 10 Center Drive, Building 10, NIH-Clinical Research Center, Room 1-3330, MSC1103, Bethesda, Maryland 20892, USA

### Supplemental Materials

Supplemental Materials include 1 Supplemental Figure with legend.

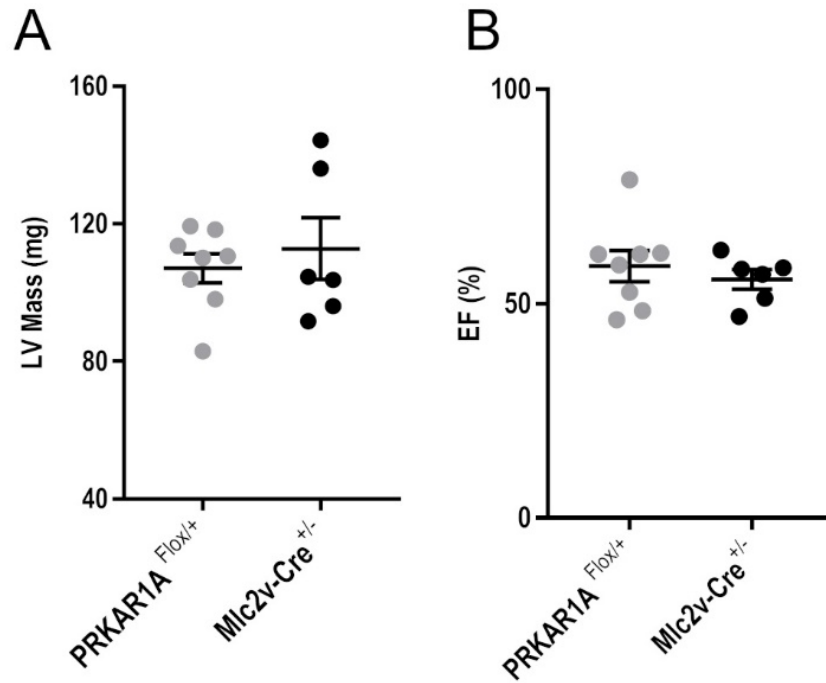

**Supplemental Figure S1.** Left ventricle mass and cardiac function were comparable between *PRKAR1A<sup>Flox/+</sup>* and *Mlc2v-Cre<sup>+/-</sup>* mice. **(A)** Left ventricular (LV) mass, and **(B)** LV ejection fraction (EF) was assessed using echocardiography. *PRKAR1A<sup>Flox/+</sup>*, n=8; *Mlc2v-Cre<sup>+/-</sup>*, n=6.
